# Supplementary material for: Giant nonlinear optical responses of carbyne
Source: Royal Society of Chemistry journal article supplement (doi:10.1039/c6tc00648e), 2016-01-01

## **Supplemental Information for**

### **Giant nonlinear optical responses of carbyne**

C. R. Ma, J. Xiao, G. W. Yang

*State Key Laboratory of Optoelectronic Materials and Technologies, Nanotechnology  
Research Center, School of Materials Science & Engineering, School of Physics &  
Engineering, Sun Yat-sen University, Guangzhou 510275, Guangdong, P. R. China.*

**Figure S1. The spectrum characterization of carbyne.** (a) UV-Vis spectrum. (b) XRD pattern. The XRD pattern shows clean, shape, strong peaks, indicating carbyne crystals with good crystallinity. These peaks are indexed to the hexagonal structure of carbyne. Note that there is an obvious preferred orientation along the c-axis. (c) The micro-Raman spectra (514 nm laser source) of the samples show two sharp peaks, at 1050 and 2175  $\text{cm}^{-1}$ , which are identified as the characteristic peaks of carbon–carbon single bonds and triple bonds, respectively, of carbyne. (d) FTIR spectrum. The signal in the FTIR spectrum at 2168  $\text{cm}^{-1}$  is in agreement with the reported value for carbon–carbon triple bonds, between 2000 and 2200  $\text{cm}^{-1}$ .

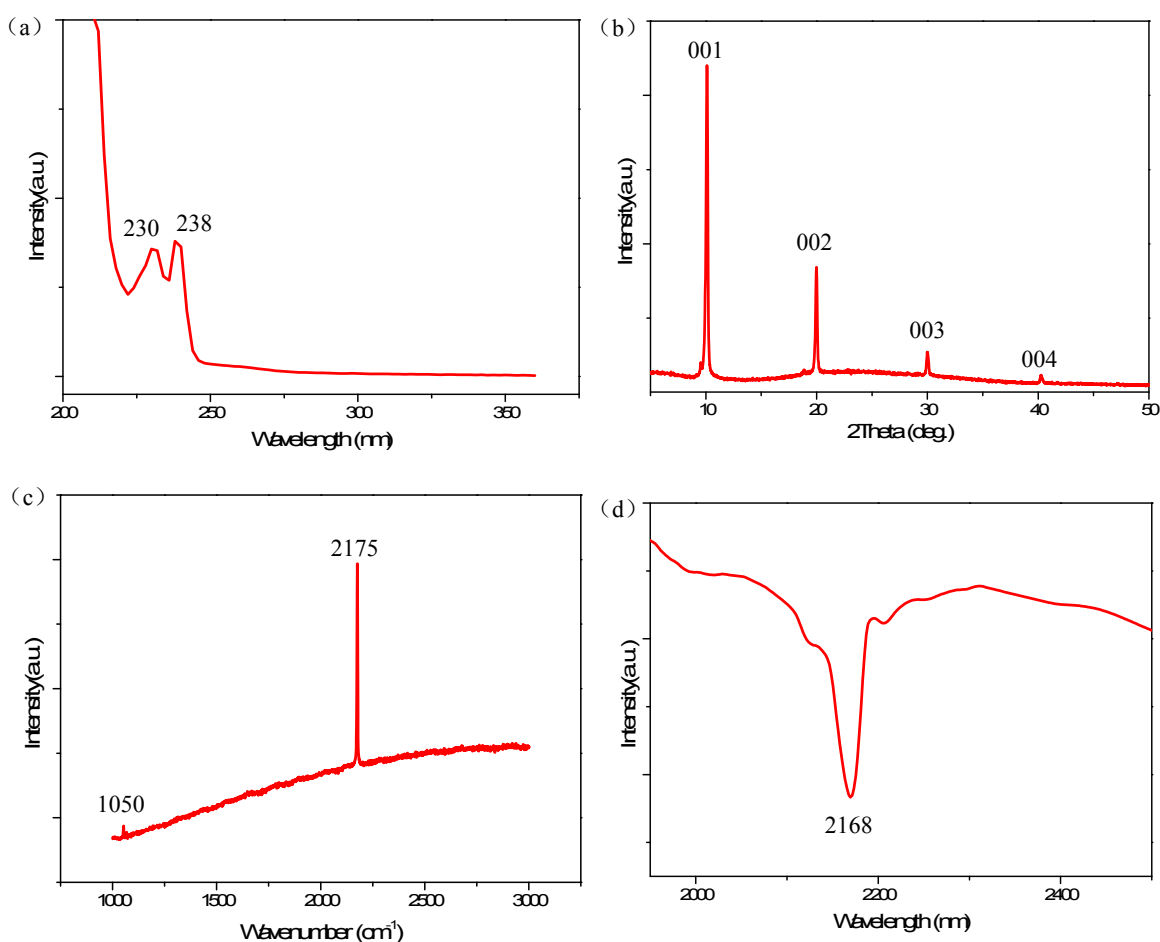

**Figure S2. The FTIR spectrum of carbyne (Black line).** The signal located at near 1500 and 2850-3000  $\text{cm}^{-1}$  represent the  $\text{CH}_2$  or  $\text{CH}_3$  bending and stretching vibration. The peak at 1750  $\text{cm}^{-1}$  belongs to the signal of  $\text{C}=\text{O}$  and the peak near 2160  $\text{cm}^{-1}$  comes from the stretching vibration of  $\text{C}\equiv\text{C}$  bond. The FTIR spectrum of alcohol is taken for comparison (Red line).

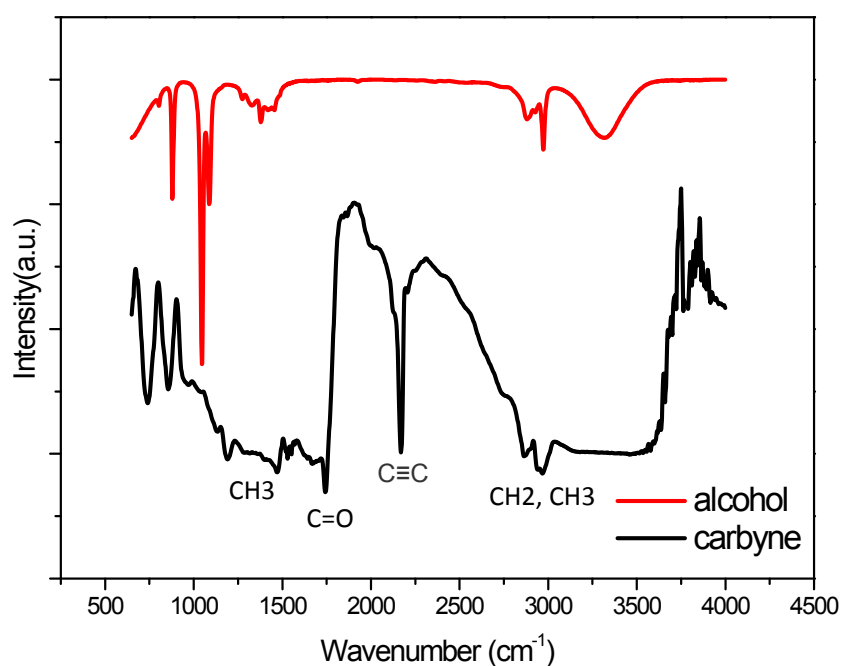

**Figure S3. SEM and TEM images.**(a) SEM image of carbyne crystals. They are in the shape of flakes, which are stacking together. (b) TEM image of carbyne crystals with rod-like morphology. (c-d) SAED patterns and HRTEM images are based on the [001]directions of incident electron beam.

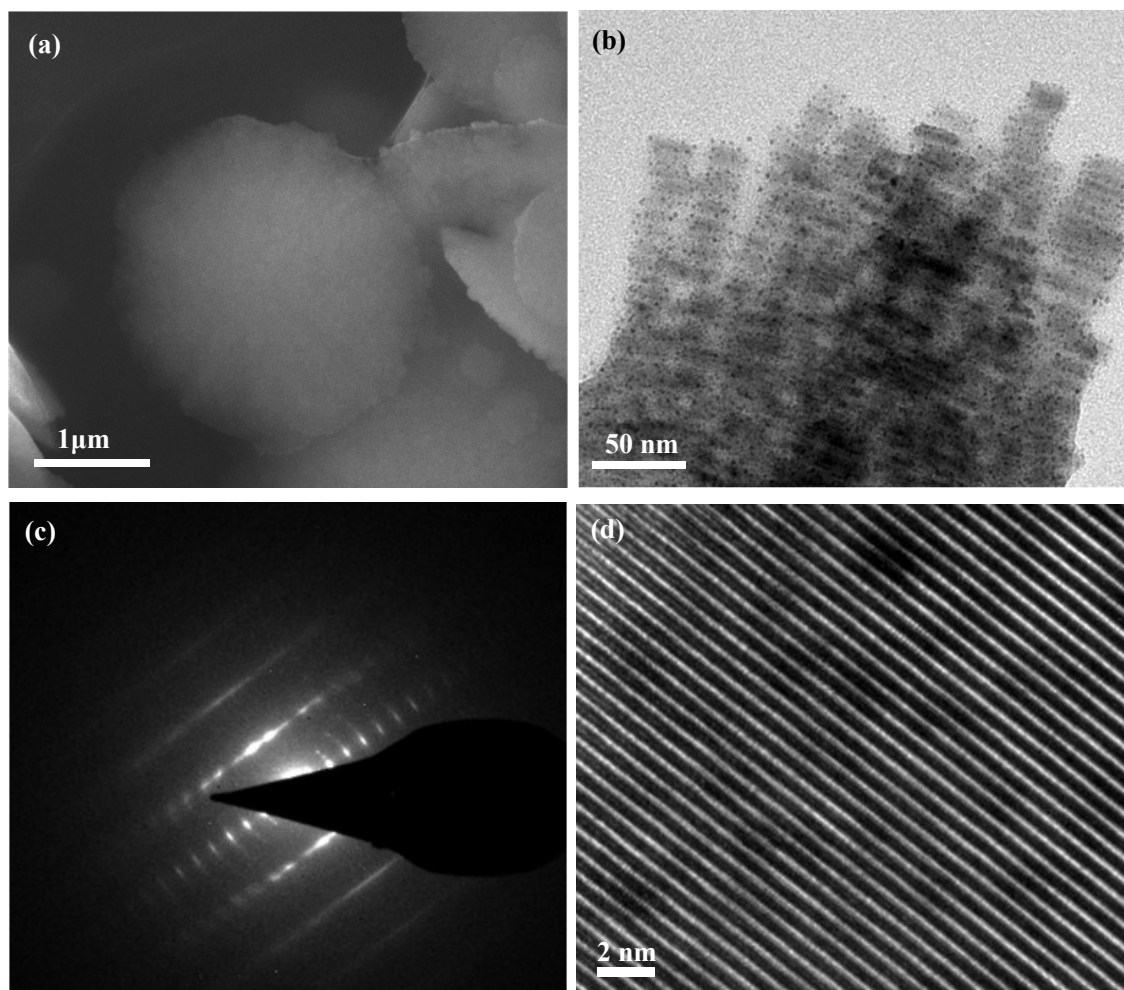

Supplement: c6tc00648e1.pdf [file c6tc00648e1.pdf]
